# Supplementary material for: Increased Insular Connectivity and Enhanced Empathic Ability Associated with Dance/Music Training
Source: Hindawi journal article supplement (doi:10.1155/2019/9693109), 2019-05-06
Supplement: f1 [file 9693109.f1.pdf]

## Supplementary material

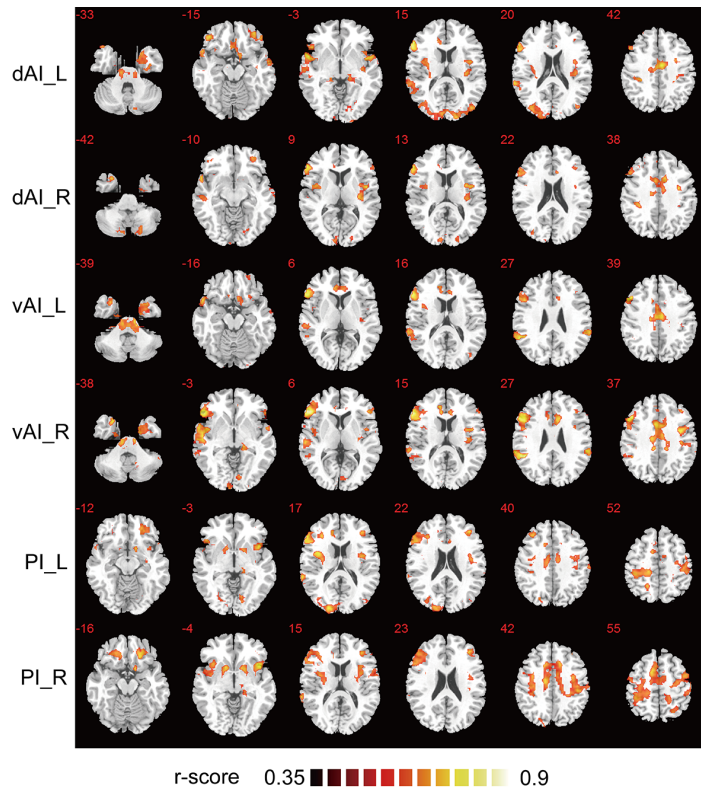

**Figure 1:** The correlation coefficients were shown between C-IRI total score and FCs within six insular sub-region networks in dancer group.

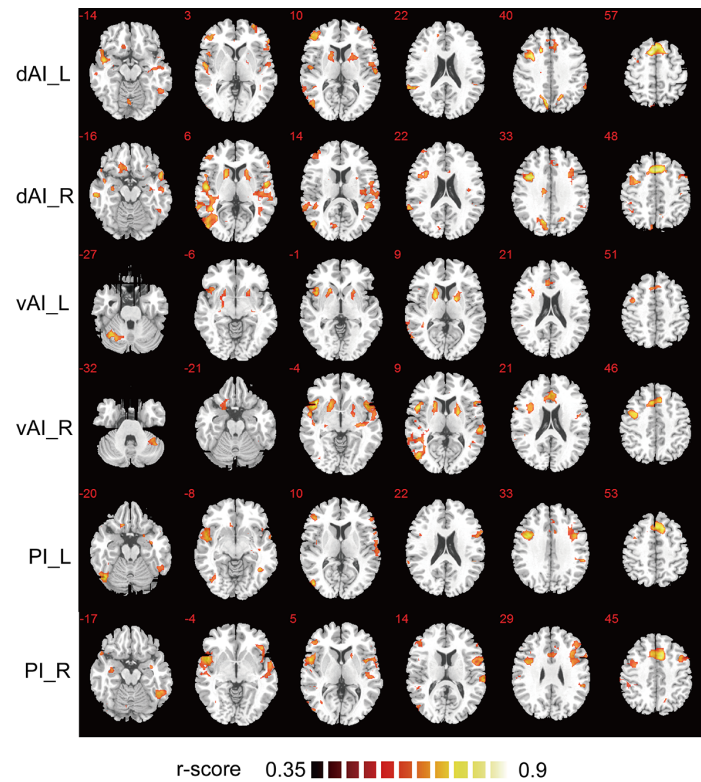

**Figure 2:** The correlation coefficients were shown between C-IRI total score and FCs within six insular sub-region networks in musician group.
